# Supplementary figures and images for: Optimization of Pre-Inoculum, Fermentation Process Parameters and Precursor Supplementation Conditions to Enhance Apigenin Production by a Recombinant Streptomyces albus Strain
Source: MDPI journal article supplement (doi:10.3390/fermentation7030161), 2021-08-21

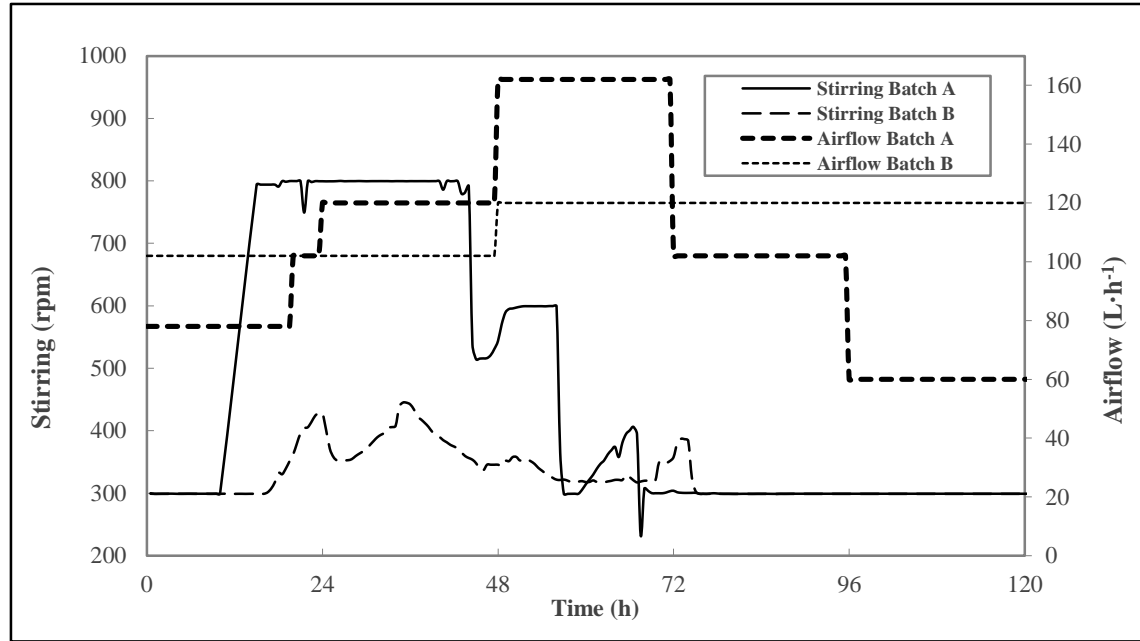

Supplement: s1 [file s1]
